# Mantle cell lymphoma-like lymphomas in *c-myc-3'RR/p53<sup>+/-</sup>* mice and *c-myc-3'RR/Cdk4<sup>R24C</sup>* mice: differential oncogenic mechanisms but similar cellular origin

Pauline Rouaud<sup>1</sup>, Rémi Fiancette<sup>1</sup>, Christelle Vincent-Fabert<sup>1</sup>, Virginie Magnone<sup>2</sup>, Michel Cogné<sup>1</sup>, Pierre Dubus<sup>3</sup> and Yves Denizot<sup>1</sup>

<sup>1</sup> UMR CNRS 7276, Faculté de Médecine, Limoges, France

<sup>2</sup> CNRS and University of Nice Sophia Antipolis, Institut de Pharmacologie Moléculaire et Cellulaire, UMR 6097, Sophia Antipolis, France

<sup>3</sup> EA2406, Université de Bordeaux, Bordeaux, France

Correspondence to: Yves Denizot, email: yves.denizot@unilim.fr

Keywords: Mantle cell lymphoma, *c-myc*

Received: April 3, 2012,

Accepted: April 28, 2012,

Published: May 15, 2012

Copyright: © Rouaud et al. This is an open-access article distributed under the terms of the Creative Commons Attribution License, which permits unrestricted use, distribution, and reproduction in any medium, provided the original author and source are credited.

## ABSTRACT:

**Mantle cell lymphoma (MCL) is a malignant lymphoproliferative B-cell disorder that does not occur spontaneously in mice but experimental mice model have been developed. Recently two different mice models prone to develop MCL-like lymphomas were generated: *c-myc-3'RR/Cdk4<sup>R24C</sup>* mice and *c-myc-3'RR/p53<sup>+/-</sup>* mice. Comparison of their gene expression profiles does not highlight specific differences other than those in relation with their specific mutational status (i.e., *Cdk4<sup>R24C</sup>* mutation or *p53* mutation). We propose that similarly to typical human MCL and its blastoid or cyclin-D1 variants that correspond to the same genetic entity, MCL-like lymphomas of *c-myc-3'RR/p53<sup>+/-</sup>* mice and *c-myc-3'RR/Cdk4<sup>R24C</sup>* mice represent a spectrum of the same entity.**

## INTRODUCTION

Mantle cell lymphoma (MCL) is a malignant lymphoproliferative B-cell disorder derived from naïve pregerminal center CD5<sup>+</sup> cells [1]. MCL is strongly associated with the t(11,14) chromosomal translocation leading to overexpression of cyclin D1. Cyclin D1-negative MCL do not express high amounts of cyclin D1 but elevated cyclin D2 or cyclin D3 ones and share the same secondary genetic aberrations that typical MCL supporting the concept that they correspond to the same genetic entity [1]. MCL does not occur spontaneously in mice but experimental mice model have been developed. Old E $\mu$ -cyclin D1 transgenic mice developed CD19<sup>+</sup>IgM<sup>+</sup>CD5<sup>+</sup>CD23<sup>-</sup> MCL under stimulation by pristine, a pro-inflammatory tumor promoter [2]. Interleukin 14 alpha (IL-14 $\alpha$ )/*c-myc* double transgenic mice developed lymphomas reproducing many features of blastoid variant of MCL [3]. Recently we generated two different mice models prone to develop MCL-like lymphomas. The first one uses the Cdk4-Arg24Cys (R24C) mutation that abolishes the ability of all four INK4 members to bind Cdk4. Disruption of

Cdk4 regulation by INK4 while *c-myc* is overexpressed in B-cells (in a *c-myc-3'RR* transgenic background prone to develop Burkitt lymphoma (BL)-like lymphomas [4]) leads to the development (in double mutant *c-myc-3'RR/Cdk4<sup>R24C</sup>* mice) of lymphoid malignancies closely resembling human MCL [5]. The second is relevant to the frequent loss of p53 function observed in human lymphomas, underscoring its critical role in suppressing the emergence of incipient tumors. Double mutant *c-myc-3'RR/p53<sup>+/-</sup>* mice developed a wide pattern of lymphomas including MCL-like lymphomas [6]. It remains unclear what are the common molecular and genetic pathways explaining the convergence of these two mice models towards the same lymphoma phenotype. In both situations, MCL-like lymphomas express similar membrane B-cell differentiation markers (B220<sup>+</sup>CD19<sup>+</sup>IgM<sup>+</sup>IgD<sup>+</sup>CD5<sup>+</sup>CD23<sup>-</sup>) but arise with different kinetics (3 months vs 6 months for *c-myc-3'RR/p53<sup>+/-</sup>* mice and *c-myc-3'RR/Cdk4<sup>R24C</sup>* mice, respectively), with a different proteomic signature (Cdk6/cyclin D complexes vs Cdk4/cyclin D complexes for *c-myc-3'RR/p53<sup>+/-</sup>* mice and *c-myc-3'RR/Cdk4<sup>R24C</sup>* mice, respectively), and in relation with a different mutational status (p53 deficiency vs disruption

**Table 1: Genes implicated in growth, metabolism and signalling processes.**

| Name     | Systematic Name | Description                                              | Log2  | p-    | log   |
|----------|-----------------|----------------------------------------------------------|-------|-------|-------|
|          |                 |                                                          | ratio | value | score |
|          |                 |                                                          | A-B   | A-B   | A-B   |
| Tppp     | NM_182839       | polymerization promoting protein                         | -5.97 | 0.03  | 4.48  |
| Prkcc    | NM_011102       | protein kinase C, gamma                                  | -4.35 | 0.03  | 4.28  |
| Gchfr    | NM_177157       | GTP cyclohydrolase I feedback regulator                  | -3.91 | 0.03  | 4.14  |
| Chit1    | NM_027979       | chitinase 1 (chitotriosidase)                            | -5.14 | 0.03  | 4.11  |
| Ahnak    | NM_001039959    | nucleoprotein (desmoyokin), TV 3                         | -4.48 | 0.03  | 3.95  |
| Trf      | NM_133977       | transferrin                                              | -4.41 | 0.03  | 3.94  |
| Apoc1    | NM_007469       | apolipoprotein C-I, TV 1                                 | -3.74 | 0.03  | 3.94  |
| MacroD2  | NM_028387       | MACRO domain containing 2, TV 2                          | 2.89  | 0.03  | 3.56  |
| Rfx2     | NM_009056       | regulatory factor X, TV 2                                | -3.31 | 0.03  | 3.52  |
| Ctse     | NM_007799       | cathepsin E                                              | -4.17 | 0.03  | 3.46  |
| Cdkn2a   | NM_009877       | cyclin-dependent kinase inhibitor 2A, TV 1               | 4.17  | 0.03  | 3.45  |
| Slc40a1  | NM_016917       | solute carrier family 40, M 1                            | -5.21 | 0.03  | 3.43  |
| Igf1     | NM_010512       | insulin-like growth factor 1, TV 1                       | -3.1  | 0.03  | 3.43  |
| Igf2bp3  | NM_023670       | insulin-like growth factor 2 mRNA binding protein 3      | 2.85  | 0.03  | 3.38  |
| Slc2a6   | NM_172659       | solute carrier family 2, M 6                             | 2.51  | 0.03  | 3.31  |
| Ngfr     | NM_033217       | nerve growth factor receptor                             | -3.13 | 0.03  | 3.28  |
| Camk4    | NM_009793       | calcium/calmodulin-dependent protein kinase IV           | 3.42  | 0.03  | 3.25  |
| Rtn4rl1  | NM_177708       | reticulum 4 receptor-like 1                              | -4.58 | 0.03  | 3.19  |
| Ear11    | NM_053113       | eosinophil-associated, ribonuclease A family, M 11       | -2.64 | 0.03  | 3.14  |
| Ccnb1    | NM_172301       | cyclin B1                                                | 2.9   | 0.03  | 3.11  |
| Rasal1   | NM_013832       | RAS protein activator like 1 (GAP1 like)                 | 2.67  | 0.03  | 3.10  |
| As3mt    | NM_020577       | arsenic (+3 oxidation state) methyltransferase           | -2.71 | 0.03  | 3.08  |
| Ppl      | NM_008909       | periplakin                                               | -2.79 | 0.03  | 3.06  |
| Spic     | NM_011461       | spi-C transcription factor                               | -3.85 | 0.03  | 2.97  |
| Eif2c2   | NM_153178       | eukaryotic translation initiation factor 2C              | 3.42  | 0.03  | 2.95  |
| Ak4      | NM_001177602    | adenylate kinase 4, TV 1                                 | 3.54  | 0.03  | 2.93  |
| Timeless | NM_001164081    | timeless homolog (Drosophila),TV 4                       | 2.57  | 0.03  | 2.89  |
| Rgs12    | NM_173402       | regulator of G-protein signaling 12, TV 1                | 3.1   | 0.03  | 2.86  |
| Ccr3     | NM_009914       | chemokine (C-C motif) receptor 3                         | -2.74 | 0.03  | 2.79  |
| Mrap     | NM_029844       | melanocortin 2 receptor accessory protein                | -2.36 | 0.03  | 2.79  |
| Cdc20    | NM_023223       | cell division cycle 20 homolog                           | 2.26  | 0.03  | 2.77  |
| Adarb1   | NM_001024837    | adenosine deaminase B1, TV 2                             | 2.25  | 0.03  | 2.75  |
| Cot1     | NM_028071       | coactosin-like 1 (Dictyostelium)                         | -2.13 | 0.03  | 2.69  |
| Trip13   | NM_027182       | thyroid hormone receptor interactor 13                   | 2.3   | 0.03  | 2.65  |
| Atp6v1c2 | NM_133699       | ATPase, lysosomal V1 subunit C2, TV 2                    | -2.83 | 0.03  | 2.58  |
| Slc43a3  | NM_021398       | solute carrier family 43, M 3                            | 3.27  | 0.03  | 2.46  |
| Sbk1     | NM_145587       | SH3-binding kinase 1                                     | -2.45 | 0.03  | 2.38  |
| Vcam1    | NM_011693       | vascular cell adhesion molecule 1                        | -4.91 | 0.03  | 2.37  |
| Kcnj16   | NM_010604       | potassium inwardly-rectifying channel, subfamily J, M 16 | -2    | 0.03  | 2.33  |
| Lmo1     | NM_057173       | LIM domain only 1                                        | 2.01  | 0.03  | 2.30  |

|              |                   |                                                           |       |      |       |
|--------------|-------------------|-----------------------------------------------------------|-------|------|-------|
| Osbp15       | NM_024289         | oxysterol binding protein-like 5, TV 1                    | -2.17 | 0.03 | 2.30  |
| Tmco6        | NM_028036         | transmembrane and coiled-coil domains 6                   | -2.01 | 0.03 | 2.30  |
| Serpinb3c    | NM_201363         | serine (or cysteine) peptidase inhibitor, clade B, M 3C   | 2.63  | 0.03 | 2.25  |
| Trim11       | NM_053168         | tripartite motif-containing 11                            | -2.06 | 0.03 | 2.24  |
| Slc16a9      | NM_025807         | solute carrier family 16 , M 9                            | -2.07 | 0.03 | 2.23  |
| Fxyd6        | NM_022004         | FXFD domain-containing ion transport regulator 6          | 2.13  | 0.03 | 2.22  |
| Gstm5        | NM_010360         | glutathione S-transferase, mu 5                           | 2.52  | 0.03 | 2.19  |
| Slc34a1      | NM_011392         | solute carrier family 34 (sodium phosphate), M 1          | -2.82 | 0.03 | 2.14  |
| Rnf157       | ENSMUST0000149682 | ring finger protein 157                                   | 2.52  | 0.03 | 2.124 |
| Nek2         | NM_010892         | NIMA (never in mitosis gene a)-related expressed kinase 2 | 2.57  | 0.03 | 2.11  |
| C6           | NM_016704         | complement component 6                                    | -2.18 | 0.03 | 2.05  |
| H60a         | NM_010400         | histocompatibility 60a                                    | -6.18 | 0.03 | 2.04  |
| septin3      | NM_011889         | septin 3                                                  | -6.18 | 0.03 | 2.04  |
| Ear10        | NM_053112         | eosinophil-associated, ribonuclease A family, M 10        | -2.2  | 0.03 | 1.99  |
| Kctd17       | NM_001081367      | potassium channel tetramerisation domain containing 17    | 3.64  | 0.03 | 1.91  |
| Casc4        | NM_001205369      | cancer susceptibility candidate 4, TV 3                   | 2.44  | 0.03 | 1.89  |
| Tcp11l2      | NM_146008         | t-complex 11 like 2                                       | -2.88 | 0.03 | 1.83  |
| Mybl2        | NM_008652         | myeloblastosis oncogene-like 2                            | 2.16  | 0.03 | 1.83  |
| Prkar2a      | NM_008924         | protein kinase, cAMP dependent regulatory, type II alpha  | 2.1   | 0.03 | 1.81  |
| Tcp11        | NM_013687         | t-complex protein 11, TV 1                                | -2.04 | 0.03 | 1.81  |
| Tref1        | NM_172622         | transcriptional regulating factor 1,TV 2                  | 3.07  | 0.03 | 1.80  |
| Pvrl2        | NM_008990         | poliovirus receptor-related 2, TV 1                       | -4.17 | 0.03 | 1.78  |
| Prkar2b      | NM_011158         | protein kinase, cAMP dependent regulatory, type II beta   | -3.46 | 0.03 | 1.78  |
| Melk         | NM_010790         | maternal embryonic leucine zipper kinase                  | 2.23  | 0.03 | 1.75  |
| Cdca3        | NM_013538         | cell division cycle associated 3                          | 2.21  | 0.03 | 1.74  |
| B3gnt8       | NM_146184         | betaGal beta-1,3-N-acetylglucosaminyltransferase 8, TV 1  | -2.19 | 0.03 | 1.71  |
| Nradd        | NM_026012         | neurotrophin receptor associated death domain             | 2.29  | 0.03 | 1.68  |
| S100a5       | NM_011312         | S100 calcium binding protein A5                           | -2.38 | 0.03 | 1.68  |
| Antxr1       | NM_054041         | anthrax toxin receptor 1                                  | 2.25  | 0.04 | 1.64  |
| Pear1        | NM_028460         | platelet endothelial aggregation receptor 1, TV 1         | -2.6  | 0.04 | 1.62  |
| Akap13       | ENSMUST0000136989 | A kinase (PKA) anchor protein 13                          | -2.23 | 0.04 | 1.62  |
| Ebf3         | NM_010096         | early B-cell factor 3, TV 3                               | 2.86  | 0.04 | 1.60  |
| Tk1          | NM_009387         | thymidine kinase 1                                        | 2.46  | 0.04 | 1.57  |
| Rgs11        | NM_001081069      | regulator of G-protein signaling 11                       | -2.22 | 0.04 | 1.57  |
| Gm4910       | XM_141816         | predicted pseudogene 4910                                 | -2.22 | 0.04 | 1.56  |
| EII3         | NM_145973         | elongation factor RNA polymerase II-like 3                | -3.12 | 0.04 | 1.55  |
| Etl4         | NM_001081006      | enhancer trap locus 4, transcript variant c               | 3.4   | 0.04 | 1.50  |
| Syce2        | NM_027954         | synaptonemal complex central element protein 2, TV 2      | 3.17  | 0.04 | 1.47  |
| LOC100042049 | NR_004442         | ribosomal protein L22 like 1 pseudogene                   | -2.17 | 0.04 | 1.38  |
| Sorcs2       | NM_030889         | sortilin-related VPS10 domain containing receptor 2       | -2.12 | 0.04 | 1.38  |

|         |              |                                                    |       |      |      |
|---------|--------------|----------------------------------------------------|-------|------|------|
| Crip2   | NM_024223    | cysteine rich protein 2                            | -4.51 | 0.04 | 1.37 |
| Wnk2    | NM_029361    | WNK lysine deficient protein kinase 2              | 3.76  | 0.04 | 1.36 |
| Samd9l  | NM_010156    | sterile alpha motif domain containing 9-like       | -2.09 | 0.04 | 1.36 |
| Hoxb6   | NM_008269    | homeobox B6                                        | -2.23 | 0.04 | 1.35 |
| Rpl22l1 | NM_026517    | ribosomal protein L22 like 1                       | -2.02 | 0.04 | 1.34 |
| Crip1   | NM_007763    | cysteine-rich protein 1                            | -4.05 | 0.04 | 1.31 |
| Enkur   | NM_027728    | enkurin                                            | -3.01 | 0.04 | 1.30 |
| Ear2    | NM_007895    | eosinophil-associated, ribonuclease A family, M 2  | -3.45 | 0.04 | 1.29 |
| Cdca5   | NM_026410    | cell division cycle associated 5                   | 2.04  | 0.04 | 1.23 |
| Mrc1    | NM_008625    | mannose receptor, C type 1                         | -2.61 | 0.04 | 1.22 |
| Ear12   | NM_001012766 | eosinophil-associated, ribonuclease A family, M 12 | -2.29 | 0.04 | 1.20 |
| Ehf     | NM_007914    | ets homologous factor                              | 2.89  | 0.04 | 1.16 |
| Ssbp2   | NM_024272    | single-stranded DNA binding protein 2, TV 2        | 2.49  | 0.04 | 1.14 |
| Phlda3  | NM_013750    | pleckstrin homology-like domain, family A, M 3     | -4.08 | 0.04 | 1.14 |
| Whsc1   | NM_001177884 | Wolf-Hirschhorn syndrome candidate 1, TV 3         | 2.16  | 0.04 | 1.11 |
| Gm2a    | NM_010299    | GM2 ganglioside activator protein                  | -2.21 | 0.04 | 1.11 |
| Armc2   | NM_001034858 | armadillo repeat containing 2                      | 3.03  | 0.04 | 1.09 |

Comparison of transcriptoma of *c-myc-3'RR/Cdk4<sup>R24C</sup>* and *c-myc-3'RR/p53<sup>+/-</sup>* MCL-like lymphomas. Among these 44,000 genes, 176 significantly differed. A Log score >2, a Log ratio >2 or <-2 and a p<0.05 was used as cut of. A: *c-myc-3'RR/p53<sup>+/-</sup>* MCL-like lymphomas; B: *c-myc-3'RR/Cdk4<sup>R24C</sup>* MCL-like lymphomas; M: member; TV: transcript variant.

of Cdk4 regulation by INK4). Gene arrays have proven effective in establishing molecularly defined subgroups within defined tumor entities. We explored the potential similar biological entity of these two mice models of MCL-like lymphomas by comparing their gene expression profiles.

## MATERIAL AND METHODS

Our research has been approved by the ethics committee review board of our University (Limoges, France) and hospital (CHU Dupuytren, Limoges, France). Animal works has been conducted according to French laws. *c-myc-3'RR* transgenic mice are prone to BL-like lymphomas [4]. In *c-myc-3'RR* mice, *c-myc* is specifically expressed from the pre-B to the mature B-cell stages; the 3'RR being active in late B cell lymphopoiesis [7-9]. Generation of *c-myc-3'RR/Cdk4<sup>R24C</sup>* and *c-myc-3'RR/p53<sup>+/-</sup>* mice in similar genetic background and their MCL-like lymphoma development have been previously reported [5, 6]. mRNA was extracted from MCL-like lymphoma cases by sorting tumoral cells with CD19-coupled beads (Miltenyi Biotech, Bergisch Gladbach, Germany). Microarray experiments were done in "Nice - Sophia Antipolis Microarray Facility" (France). Statistical analysis was made with the Bioconductor open source software, particularly its Limma package. The microarray data presented in this article have been submitted to the Gene Expression Omnibus database ([www.ncbi.nlm.nih.gov/geo/](http://www.ncbi.nlm.nih.gov/geo/)) under the accession numbers GSE36808.

## RESULTS AND DISCUSSION

The gene expression profile of MCL-like lymphomas of *c-myc-3'RR/Cdk4<sup>R24C</sup>* mice was compared with the one of *c-myc-3'RR/p53<sup>+/-</sup>* mice using an array of 44,000 genes. A Log score >2, a Log ratio >2 or <-2 and a p<0.05 was used as cut of. Among these 44,000 genes, only 176 significantly differed (Tables 1, 2, 3 and 4). Noticeably, differential expression of multiple genes involved in growth, metabolism and signalling (97/176, 55.1%, Table 1), diabetes and obesity (31/176, 17.6%, Table 2) and cellular architecture (23/176, 13.0%, Table 3) were found. Thirty two unknown genes significantly differed (32/176, 18.1%, Table 4). Of note some genes can be found both in Table 1, 2 and/or 3.

Differences concerning genes involved in diabetes and obesity (such as *Abcc8*, *Trf*, *apoc1* and *IGF-1*) appear directly linked to the *Cdk4<sup>R24C</sup>* mutation since loss of *Cdk4* expression causes insulin-deficient diabetes and *Cdk4* activation results in  $\beta$ -islet cell hyperplasia [10]. The metabolic and endocrinic changes resulting from diabetes and obesity may dysregulate DNA repair, gene functions and cell mutation rate favouring neoplastic transformation and leading to hematologic malignancy and cancer [11]. For example *IGF-1* (insulin growth factor 1) transcripts are markedly elevated in MCL-like lymphomas of *c-myc-3'RR/Cdk4<sup>R24C</sup>* mice; *IGF-1* involvement being well documented in cancer [11]. Differences concerning genes implicated in the growth and signalling processes could be explained by the *Cdk4<sup>R24C</sup>* and *p53* mutations themselves. For example, up-regulation of the cell

**Table 2: Genes implicated in diabetes and obesity.**

| Name    | Systematic Name    | Description                                               | Log2 ratio | p-value | log score |
|---------|--------------------|-----------------------------------------------------------|------------|---------|-----------|
|         |                    |                                                           | A-B        | A-B     | A-B       |
| Abcc8   | NM_011510          | ATP-binding cassette, sub-family C, M 8                   | 4.11       | 0.03    | 4.02      |
| Ahnak   | NM_001039959       | nucleoprotein (desmoyokin), TV 3                          | -4.48      | 0.03    | 3.95      |
| Trf     | NM_133977          | transferrin                                               | -4.41      | 0.03    | 3.94      |
| Apoc1   | NM_007469          | apolipoprotein C-I, TV 1                                  | -3.74      | 0.03    | 3.94      |
| Cr2     | NM_007758          | complement receptor 2                                     | -3.62      | 0.03    | 3.77      |
| Cdkn2a  | NM_009877          | cyclin-dependent kinase inhibitor 2A, TV 1                | 4.17       | 0.03    | 3.45      |
| Gfra2   | NM_008115          | glial derived neurotrophic factor family receptor alpha 2 | -4.48      | 0.03    | 3.44      |
| Igf1    | NM_010512          | insulin-like growth factor 1, TV 1                        | -3.1       | 0.03    | 3.43      |
| Igf2bp3 | NM_023670          | insulin-like growth factor 2 mRNA binding protein 3       | 2.85       | 0.03    | 3.38      |
| Hmox1   | NM_010442          | heme oxygenase (decycling) 1                              | -3.87      | 0.03    | 3.29      |
| Gstt1   | NM_008185          | glutathione S-transferase, theta 1                        | 2.7        | 0.03    | 3.17      |
| Rcan2   | NM_207649          | regulator of calcineurin 2, TV 1                          | 3.87       | 0.03    | 3.16      |
| Tub     | NM_021885          | tubby candidate gene                                      | -3.29      | 0.03    | 3.13      |
| Osbp13  | NM_001163645       | oxysterol binding protein-like 3, TV 2                    | 2.49       | 0.03    | 2.99      |
| Mgll    | NM_001166251       | monoglyceride lipase, TV 1                                | 2.1        | 0.03    | 2.85      |
| Srd5a1  | NM_175283          | steroid 5 alpha-reductase 1                               | 3.31       | 0.03    | 2.42      |
| Rgs16   | NM_011267          | regulator of G-protein signaling 16                       | 2.96       | 0.03    | 2.23      |
| Cbs     | NM_144855          | cystathionine beta-synthase, TV 1                         | 3.82       | 0.03    | 2.19      |
| Alox5   | NM_009662          | arachidonate 5-lipoxygenase                               | 2.18       | 0.03    | 2.19      |
| Pdk1    | NM_172665          | pyruvate dehydrogenase kinase, isoenzyme 1                | 2.68       | 0.03    | 1.96      |
| Me1     | NM_001198933       | malic enzyme 1, TV 2                                      | 2.49       | 0.03    | 1.90      |
| Mef2b   | NM_001045484       | myocyte enhancer factor 2B, TV 2                          | 3.17       | 0.03    | 1.88      |
| Foxp2   | ENSMUST00000118133 | forkhead box P2 [ENSMUST00000118133]                      | 2.08       | 0.03    | 1.79      |
| Aurka   | NM_011497          | aurora kinase A                                           | 2.07       | 0.03    | 1.70      |
| Ube2e2  | NM_144839          | ubiquitin-conjugating enzyme E2E 2                        | 3.03       | 0.03    | 1.66      |
| Bmpr1a  | NM_009758          | bone morphogenetic protein receptor, type 1A              | 3.25       | 0.04    | 1.45      |
| Kcnj10  | NM_001039484       | potassium inwardly-rectifying channel, subfamily J, M 10  | -3.04      | 0.04    | 1.39      |
| Hfe     | NM_010424          | hemochromatosis                                           | -2.07      | 0.04    | 1.33      |
| Pdss1   | NM_019501          | prenyl (solanesyl) diphosphate synthase, subunit 1        | 2.06       | 0.04    | 1.07      |
| Hpgd    | NM_008278          | hydroxyprostaglandin dehydrogenase 15                     | -2.94      | 0.04    | 1.04      |
| Fabp5   | NM_010634          | fatty acid binding protein 5                              | 2.65       | 0.04    | 1.02      |

Comparison of transcriptoma of *c-myc-3'RR/Cdk4<sup>R24C</sup>* and *c-myc-3'RR/p53<sup>-/-</sup>* MCL-like lymphomas. Among these 44,000 genes, 176 significantly differed. A Log score >2, a Log ratio >2 or <-2 and a p<0.05 was used as cut of. A: *c-myc-3'RR/p53<sup>-/-</sup>* MCL-like lymphomas; B: *c-myc-3'RR/Cdk4<sup>R24C</sup>* MCL-like lymphomas; M: member; TV: transcript variant.



**Table 3: Genes implicated in cellular architecture.**

| Name     | Systematic Name | Description                                         | Log2 ratio | p-value | log score |
|----------|-----------------|-----------------------------------------------------|------------|---------|-----------|
|          |                 |                                                     | A-B        | A-B     | A-B       |
| Ahnak    | NM_001039959    | nucleoprotein (desmoyokin), TV 3                    | -4.48      | 0.03    | 3.95      |
| Myadm    | NM_016969       | myeloid-associated differentiation marker, TV 4     | -5.5       | 0.03    | 3.69      |
| Stab2    | NM_138673       | stabilin 2                                          | -3.39      | 0.03    | 3.50      |
| Fcna     | NM_007995       | ficolin A                                           | -4.8       | 0.03    | 3.46      |
| Avil     | NM_009635       | advillin                                            | 4.05       | 0.03    | 3.42      |
| Ctnnbip1 | NM_023465       | catenin beta interacting protein 1, TV 1            | 2.32       | 0.03    | 2.85      |
| Ncan     | NM_007789       | neurocan                                            | 2.23       | 0.03    | 2.78      |
| Kif18b   | NM_197959       | kinesin family member 18B                           | 2.17       | 0.03    | 2.68      |
| Pcolce2  | NM_029620       | procollagen C-endopeptidase enhancer 2              | -2.11      | 0.03    | 2.61      |
| Spock2   | NM_052994       | sparc/osteonectin                                   | 2.36       | 0.03    | 2.50      |
| Thbs3    | NM_013691       | thrombospondin 3                                    | -4.07      | 0.03    | 2.37      |
| Lmnbl    | NM_010721       | lamin B1                                            | 2.01       | 0.03    | 2.30      |
| Zwilch   | NM_026507       | Zwilch, kinetochore associated                      | 2.25       | 0.03    | 2.19      |
| Cd97     | NM_011925       | CD97 antigen, TV 1                                  | -3.62      | 0.03    | 2.07      |
| Mtus2    | NM_029920       | microtubule associated tumor suppressor candidate 2 | -4.03      | 0.03    | 1.95      |
| Cenpi    | NM_145924       | centromere protein I                                | 2.11       | 0.03    | 1.94      |
| Mef2b    | NM_001045484    | myocyte enhancer factor 2B, TV 2                    | 3.17       | 0.03    | 1.88      |
| Dscaml1  | NM_001081270    | down syndrome cell adhesion molecule-like 1         | -2.58      | 0.03    | 1.81      |
| Tubb2b   | NM_023716       | tubulin, beta 2B                                    | -4.58      | 0.03    | 1.75      |
| Spc25    | NM_001199123    | NDC80 kinetochore complex component, TV 1           | 2.23       | 0.04    | 1.56      |
| Mtap2    | NM_001039934    | microtubule-associated protein 2, TV 1              | 2.24       | 0.04    | 1.56      |
| Stmn1    | NM_019641       | stathmin 1                                          | 2.77       | 0.04    | 1.39      |
| Slmo1    | NM_144867       | slowmo homolog 1                                    | 4.5        | 0.04    | 1.17      |

Comparison of transcriptoma of *c-myc-3'RR/Cdk4<sup>R24C</sup>* and *c-myc-3'RR/p53<sup>-/-</sup>* MCL-like lymphomas. Among these 44,000 genes, 176 significantly differed. A Log score >2, a Log ratio >2 or <-2 and a p<0.05 was used as cut of. A: *c-myc-3'RR/p53<sup>-/-</sup>* MCL-like lymphomas; B: *c-myc-3'RR/Cdk4<sup>R24C</sup>* MCL-like lymphomas; M: member; TV: transcript variant.

cycle regulatory genes *Ccnb1* and *Cdc20* in MCL-like lymphomas of *c-myc-3'RR/p53<sup>-/-</sup>* mice appear directly linked to the *p53<sup>-/-</sup>* mutation that increases the rate and occurrence of *c-myc*-induced lymphomas [6, 12]. Indeed, *Ccnb1* overexpression in lymphomas is caused by non-functional *p53* [13], while *Cdc20* is negatively regulated by *p53* [14]. In turn the down regulation of the *Cdk4* inhibitor *Cdkn2a* in MCL-like lymphomas of *c-myc-3'RR/Cdk4<sup>R24C</sup>* mice appears related to its inefficiency in *Cdk4<sup>R24C</sup>* mice. As a consequence of a higher proliferation rate, several genes implicated in cell metabolism (such as *Adarb1*, *Lmo1*, *AK4*, *Slc2a4*) and nuclear membrane or chromosome stability (such as *Lmnbl* and *Cenpi*) are higher in MCL-like lymphomas of *c-myc-3'RR/p53<sup>-/-</sup>* mice than in MCL-like lymphomas of *c-myc-3'RR/*

*Cdk4<sup>R24C</sup>* mice. Finally and also linked to a higher rate of proliferation, several differences are found concerning genes implicated in cellular architecture especially on the actin and microtubule cytoskeletons (such as *advillin* *Kif18b*, *Mtus2*, *Tubb2b*, *Mtap2*, *Stmn1*), key players that underpin growth processes [15].

MCL-like lymphomas of *c-myc-3'RR/p53<sup>-/-</sup>* mice are more aggressive than those of *c-myc-3'RR/Cdk4<sup>R24C</sup>* mice despite similar flow cytometry profiles [5, 6]. Comparison of their gene expression profiles explains this difference by a marked overexpression of several cell cycle regulatory genes. Gene expression profiles do not highlight other specific differences other than those in relation with their specific mutational status (*i.e.*, *Cdk4<sup>R24C</sup>* or *p53* mutations). We propose that similarly to typical human MCL and its

**Table 4: Unknown genes.**

| Name               | Systematic Name | Description                                          | Log2 ratio | p-value | log score |
|--------------------|-----------------|------------------------------------------------------|------------|---------|-----------|
|                    |                 |                                                      | A-B        | A-B     | A-B       |
| Pqlc1              | NM_001164420    | PQ loop repeat containing 1, TV 2                    | -3.62      | 0.03    | 3.97      |
| NAP101497-1        | same            | unknown                                              | -2.54      | 0.03    | 3.09      |
| LOC100502767       | XR_104684       | hypothetical LOC100502767                            | 3.01       | 0.03    | 3.04      |
| A_55_P1973560      | same            | unknown                                              | 2.29       | 0.03    | 2.99      |
| Ng23               | NM_023893       | Ng23 protein                                         | 4.68       | 0.03    | 2.92      |
| A_55_P2137023      | same            | unknown                                              | 2.64       | 0.03    | 2.87      |
| ENSMUST00000103452 | same            | predicted gene 16886                                 | -2.55      | 0.03    | 2.75      |
| Frm5               | NM_172673       | FERM domain containing 5                             | 2.51       | 0.03    | 2.56      |
| 493142911Rik       | NM_001081121    | RIKEN cDNA 493142911 gene                            | -4.04      | 0.03    | 2.46      |
| 5730416F02Rik      | NR_033596       | RIKEN cDNA 5730416F02 gene                           | -2.66      | 0.03    | 2.28      |
| ENSMUST00000098678 | same            | RIKEN cDNA D930028M14 gene                           | -2.44      | 0.03    | 2.16      |
| ENSMUST00000103381 | same            | predicted gene 16944                                 | -2.54      | 0.03    | 2.15      |
| ENSMUST00000103341 | same            | predicted gene 16729                                 | -5.03      | 0.03    | 2.00      |
| Clip3              | NM_001081114    | CAP-GLY domain containing linker protein 3           | 3.96       | 0.03    | 1.89      |
| ENSMUST00000103314 | same            | predicted gene 16798                                 | -4.33      | 0.03    | 1.80      |
| ENSMUST00000103348 | same            | predicted gene 1502                                  | -4.52      | 0.03    | 1.76      |
| Cd2                | NM_013486       | CD2 antigen                                          | -2.97      | 0.03    | 1.72      |
| 9030409G11Rik      | NM_001109685    | RIKEN cDNA 9030409G11 gene, TV 3                     | 2.64       | 0.03    | 1.69      |
| ENSMUST00000103444 | same            | predicted gene 16971                                 | -2.46      | 0.03    | 1.69      |
| Lrrc23             | NM_013588       | leucine rich repeat containing 23                    | -3.82      | 0.03    | 1.67      |
| Sssca1             | NM_020491       | Sjogren's syndrome/scleroderma autoantigen 1 homolog | 2.06       | 0.04    | 1.64      |
| ENSMUST00000103316 | same            | predicted gene 5571                                  | -3.83      | 0.04    | 1.59      |
| Gm3227             | XR_105936       | predicted gene 3227                                  | -2.99      | 0.04    | 1.46      |
| C77080             | NM_001033189    | expressed sequence C77080                            | -3.6       | 0.04    | 1.44      |
| 2810025M15Rik      | NR_027984       | RIKEN cDNA 2810025M15 gene                           | 2.05       | 0.04    | 1.25      |
| 2200002J24Rik      | NM_026961       | RIKEN cDNA 2200002J24 gene                           | 2.24       | 0.04    | 1.25      |
| 6030419C18Rik      | NM_176921       | RIKEN cDNA 6030419C18 gene                           | 2.42       | 0.04    | 1.20      |
| ENSMUST00000103493 | same            | predicted gene 16694                                 | -2.37      | 0.04    | 1.16      |
| A_55_P2040519      | A_55_P2040519   | unknown                                              | 2.63       | 0.04    | 1.14      |
| A_55_P2121294      | same            | unknown                                              | -2.46      | 0.04    | 1.12      |
| D330028D13Rik      | NM_172727       | RIKEN cDNA D330028D13 gene, TV 1                     | 2.05       | 0.04    | 1.11      |
| LOC100502627       | BC058714        | cDNA clone IMAGE:6842867                             | 2.26       | 0.04    | 1.01      |

Comparison of transcriptoma of *c-myc-3'RR/Cdk4<sup>R24C</sup>* and *c-myc-3'RR/p53<sup>+/-</sup>* MCL-like lymphomas. Among these 44,000 genes, 176 significantly differed. A Log score >2, a Log ratio >2 or <-2 and a p<0.05 was used as cut of. A: *c-myc-3'RR/p53<sup>+/-</sup>* MCL-like lymphomas; B: *c-myc-3'RR/Cdk4<sup>R24C</sup>* MCL-like lymphomas; M: member; TV: transcript variant.

blastoid or cyclin-D1 variants that correspond to the same genetic entity [1], MCL-like lymphomas of *c-myc-3'RR/p53<sup>+/-</sup>* mice and *c-myc-3'RR/Cdk4<sup>R24C</sup>* mice represent a spectrum of the same entity. Our results indicate that deregulation of two different signalling pathways within a single B cell entity can lead to the emergence of a unique lymphoma phenotype carrying different oncogenic stigmas. These different oncogenic stigmas explain differences concerning the proliferative and/or apoptotic status of the lymphoma and thus potential differential responses to treatment. Tumor transcriptoma analysis and tumor DNA sequence analysis could thus become useful laboratory tests paving the way towards personalized treatments [16].

## ACKNOWLEDGMENTS

We acknowledge the technological expertise of the Nice Sophia-Antipolis Functional Genomics Platform. The authors thank Pascal Barbry for helpful discussions and support during this work.

## GRANT SUPPORT

This work was supported by grants from Ligue Contre le Cancer (comité départemental de la Haute-Vienne, Creuse, Corrèze, Gironde et Landes), Comité d'Organisation sur la Recherche sur le Cancer en Limousin, Conseil Régional du Limousin, and ANR (Projets Blanc 2011). C. Vincent-Fabert was supported by a grant from the Association pour la Recherche sur le Cancer (ARC). P. Dubus were supported by grants from the Région Aquitaine. The Nice Sophia-Antipolis Functional Genomics Platform was supported by MICROENVIMET, FP7-HEALTHF2-2008-201279, the ARC, and the INCa.

## CONFLICT OF INTEREST

None

## REFERENCE

1. Jares P, Campo E: Advances in the understanding of mantle cell lymphoma. *Br J Haematol* 2008;142:149-165.
2. Smith MR, Joshi I, Jin F, Al-Saleem T: Murine model for mantle cell lymphoma. *Leukemia* 2006;20:891-893.
3. Ford R J, Shen L, Lin-Lee YC, Pham LV, Multani A, Zhou HJ, Tamayo AT, Zhang C, Hawthorn L, Cowell JK, Ambrus JL Jr: Development of a murine model for blastoid variant mantle-cell lymphoma. *Blood* 2007;109:4899-4906.
4. Truffinet V, Pinaud E, Cogné N, Petit B, Guglielmi L, Cogné M, Denizot Y: The 3' IgH locus control region is sufficient to deregulate a c-myc transgene and promote mature B cell malignancies with a predominant Burkitt-like

phenotype. *J Immunol* 2007;179:6033-6042.

5. Vincent-Fabert C, Fiancette R, Rouaud P, Baudet C, Truffinet V, Magnone V, Guillaudeau A, Cogné M, Dubus P, Denizot Y: A defect of the INK4-Cdk4 checkpoint and c-myc collaborate in blastoid mantle cell lymphoma (MCL)-like lymphoma formation in mice. *Am J Pathol* 2012;180:1688-1701.
6. Fiancette R, Rouaud P, Vincent-Fabert C, Laffleur B, Magnone V, Cogné M, Denizot Y: A p53 defect sensitizes various stages of B cell development to lymphomagenesis in mice carrying an IgH 3' regulatory region-driven c-myc transgene. *J Immunol* 2011;187: 5772-5782.
7. Vincent-Fabert C, Fiancette R, Cogné M, Pinaud E, Denizot Y: The IgH 3' regulatory region and its implication in lymphomagenesis. *Eur J Immunol* 2010;40:3306-3311.
8. Guglielmi L, Le Bert M, Truffinet V, Cogné M, Denizot Y. Insulators to improve expression of a 3'IgH LCR-driven reporter gene in transgenic mouse models. *Biochem Biophys Res Commun* 2003;307:466-471.
9. Pinaud E, Marquet M, Fiancette R, Péron S, Vincent-Fabert C, Denizot Y, Cogné M: The IgH locus 3' regulatory region: pulling the strings from behind. *Adv Immunol* 2011;110:27-70
10. Rane SG, Dubus P, Mettus RV, Galbreath EJ, Boden G, Reddy EP, Barbacid M: Loss of Cdk4 expression causes insulin-deficient diabetes and Cdk4 activation results in  $\beta$ -islet cell hyperplasia. *Nat Genet* 1999;22:44-52.
11. Lichtman MA: Obesity and the risk for haematological malignancy: leukaemia, lymphoma, or myeloma. *The oncologist* 2010;15:1083-1101.
12. Post SM, Quintas-Cardama A, Terzian T, Smith C, Eischen CM, Lozano G: p53-dependent senescence delays E $\mu$ -myc-induced B-cell lymphomagenesis. *Oncogene* 2010;29:1260-1269.
13. Yu M, Zhan Q, Finn OJ: Immune recognition of cyclin B1 as a tumor antigen is a result of its overexpression in human tumors that is caused by non-functional p53. *Mol Immunol* 2002;38:981-987.
14. Kidokoro T, Tanikawa C, Furukawa Y, Katagiri T, Nakamura Y, Matsuda K: CDC20, a potential cancer therapeutic target, is negatively regulated by p53. *Oncogene* 2008;27:1562-1571.
15. Hall A: The cytoskeleton and cancer. *Cancer Metastasis Rev* 2009;28:5-14.
16. Alinari L, Christian B, Baiocchi RA: Novel targeted therapies for mantle cell lymphoma. *Oncotarget* 2012;2:203-211.
